# Supplementary material
Source: Springer Nature journal article supplement (https://www.springermedizin.de/resource/supplementary/12936_2006_263_MOESM5_ESM.pdf/9547334)
Supplement: MOESM5 [file 9547334]

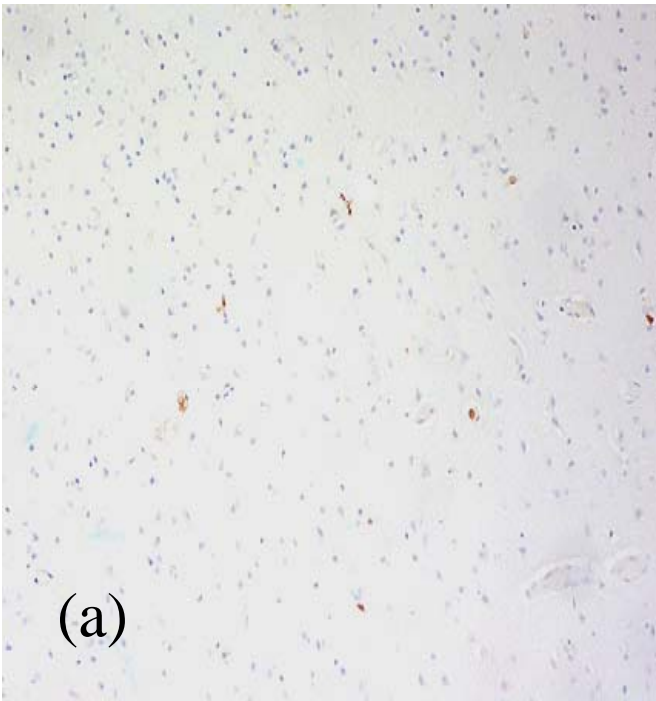

**A paediatric control**

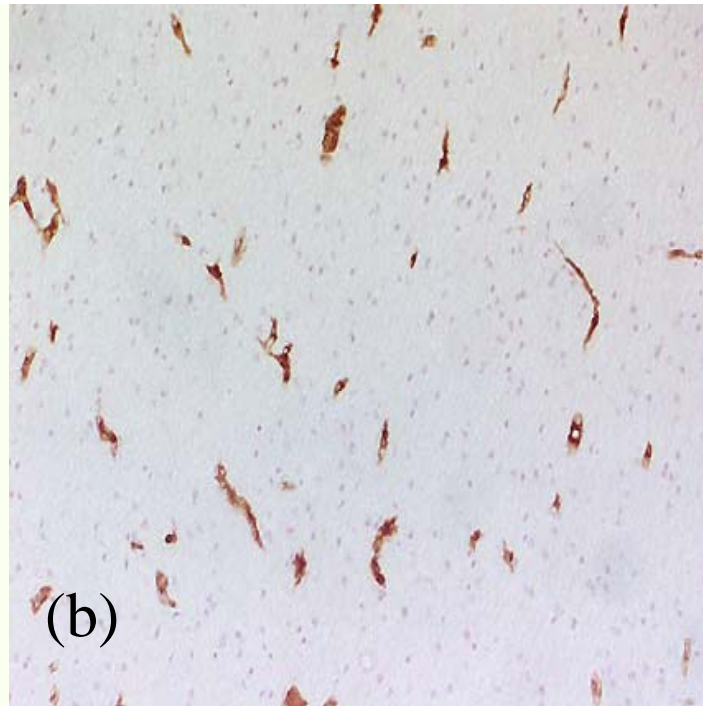

**A comatose *Salmonella enteritidis* sepsis case**

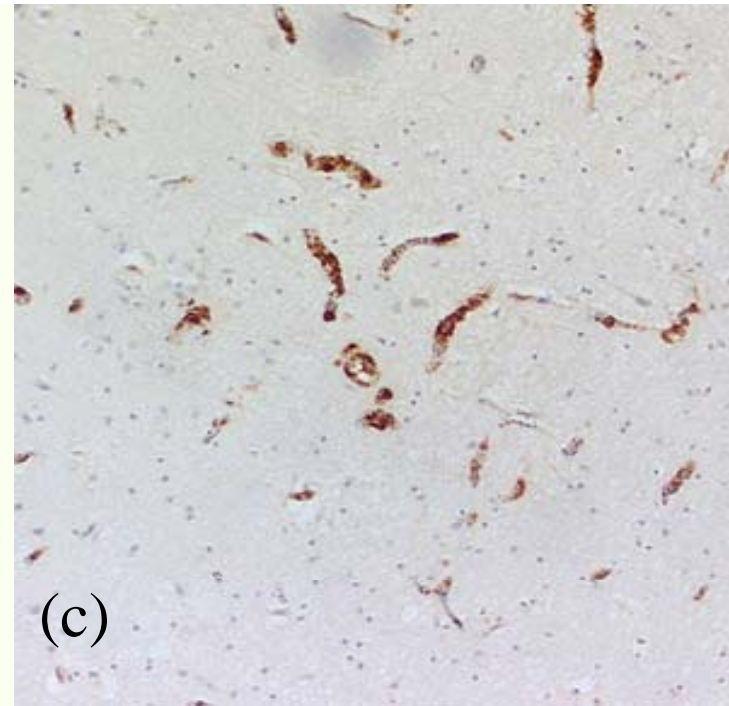

**A comatose falciparum malaria case**
